# Supplementary material for: The fine‐scale genetic structure and selection signals of Chinese indigenous pigs
Source: PubMed Central journal article supplement (PMC6976964; doi:10.1111/eva.12887), 2019-11-22
Supplement: EVA-13-458-s001.pdf [file EVA-13-458-s001.pdf]

1 **Supplementary Materials**

2 **Table S1** Location and characteristics of 42 Chinese pig breeds

3 See the “Table S1.xlsx” file

4

5 **Table S2** Severn tag SNPs representing *EPASI* haplotypes on chromosome 3

| <b>Position (bp)</b> | <b>Primer</b> | <b>Sequence (5'-3')</b> |
|----------------------|---------------|-------------------------|
| 100184171            | FP            | CCCCCGGTGATAAGAAATGGG   |
|                      | RP            | GCCCAAAGGCTTCCAGAGTA    |
| 100198784            | FP            | CTGCATGGGTTGGAAATTGGG   |
|                      | RP            | AAGCTATCATGGACCCCTCG    |
| 100177923            | FP            | GATGCCCGCTAGGATGTTGA    |
|                      | RP            | GGTCTGCTGACTGCAAAAGC    |
| 100194326            | FP            | CCCTTAGCGGTGCTGGAATA    |
|                      | RP            | CTCTGCCGAACTTCCAGTCC    |
| 100212129            | FP            | ACGGAAATGGAATCCTGCTCA   |
|                      | RP            | CCAACCCATCTCATGGTGGT    |
| 100195554            | FP            | ATGCCTTTCCTTGAGGTCGG    |
|                      | RP            | CCCTGAACCGCCAGTTTTTG    |
| 100204652            | FP            | TCAGCTCTTGCCCCTTGATG    |
|                      | RP            | GGCTCCATGGCTTCTCAACT    |

6

7 **Table S3** Primers for detecting *EDNRB* transcripts and mutations

| <b>Primer</b> | <b>Sequence (5'-3')</b>                               | <b>Annealing temperature</b> |
|---------------|-------------------------------------------------------|------------------------------|
| F1/R1         | F: GGAAGTTGTCATATCCGTGATCA<br>R: CAACATGGCGTCCCTGAATT |                              |
| F2/R2         | F: CTGTGGTGAAGGTTGCAGAC<br>R: CAACATGGCGTCCCTGAATT    | 57 °C                        |
| F3/R3         | F: CAACATTCCCAACCCAGGGA<br>R: CACAGCAACACAGGATCCCA    |                              |
| F4/R4         | F: ACCCTGTCAAGGTCATTGAGTA<br>R: GACTGGCACCAGCAGCATAA  | 55 °C                        |
| F5/R5         | F: ACCCTGTCAAGGTCATTGAGTA<br>R: CAACATTCCCAACCCAGGGA  |                              |

9 **Table S4** Genome-wide distribution of ROH per category

| <b>Breed</b>        | <b>ROH<sub>(0.5- Mb)</sub></b> | <b>ROH<sub>(1-5Mb)</sub></b> | <b>ROH<sub>(&gt;5Mb)</sub></b> |
|---------------------|--------------------------------|------------------------------|--------------------------------|
| <b>Chinese pigs</b> |                                |                              |                                |
| EHL                 | 2629                           | 1849                         | 148                            |
| JH                  | 3063                           | 2788                         | 362                            |
| JQH                 | 2795                           | 2251                         | 341                            |
| JXH                 | 2656                           | 3720                         | 855                            |
| LEP                 | 2213                           | 1847                         | 145                            |
| MI                  | 3102                           | 2594                         | 279                            |
| PTH                 | 2707                           | 2481                         | 202                            |
| SHX                 | 2587                           | 2407                         | 274                            |
| WNH                 | 2144                           | 1609                         | 169                            |
| YSH                 | 2353                           | 1784                         | 122                            |
| BMX                 | 2324                           | 2127                         | 267                            |
| CJX                 | 1905                           | 2095                         | 408                            |
| DHB                 | 2078                           | 2230                         | 321                            |
| DN                  | 2079                           | 1598                         | 191                            |
| DSX                 | 2817                           | 2313                         | 184                            |
| LT                  | 2887                           | 2463                         | 108                            |
| LUC                 | 3575                           | 2601                         | 149                            |
| S-HUAI              | 1808                           | 2228                         | 438                            |
| TUNC                | 2052                           | 1830                         | 320                            |
| WZS                 | 1852                           | 1045                         | 120                            |
| DWZ                 | 2351                           | 1829                         | 139                            |
| NX                  | 2024                           | 1413                         | 144                            |
| SZL                 | 2275                           | 1934                         | 96                             |
| TC                  | 2549                           | 1820                         | 223                            |
| XXH                 | 2438                           | 2533                         | 168                            |
| BAM                 | 1853                           | 910                          | 183                            |
| BS                  | 940                            | 646                          | 36                             |
| DH                  | 1338                           | 626                          | 22                             |
| GST                 | 2533                           | 1697                         | 1                              |
| HJH                 | 1421                           | 419                          | 238                            |
| MG                  | 1394                           | 1064                         | 93                             |
| NJ                  | 1963                           | 1565                         | 99                             |
| QP                  | 2038                           | 1294                         | 60                             |
| RC                  | 2669                           | 1414                         | 34                             |
| SB                  | 1623                           | 703                          | 24                             |
| HT                  | 1657                           | 946                          | 118                            |
| LWU                 | 3306                           | 1476                         | 20                             |
| MAS                 | 3416                           | 1082                         | 2                              |
| MIN                 | 2221                           | 1312                         | 220                            |

|        |      |      |     |
|--------|------|------|-----|
| N-HUAI | 2251 | 909  | 6   |
| WEI    | 2156 | 2108 | 389 |
| LIC    | 1694 | 407  | 1   |
| SUT    | 2403 | 2351 | 237 |
| WB     | 949  | 829  | 125 |

**European pigs**

|    |      |      |     |
|----|------|------|-----|
| DU | 4678 | 3444 | 306 |
| LR | 4277 | 2284 | 62  |
| LW | 3277 | 2930 | 384 |
| PI | 4500 | 3158 | 204 |

---

10 Abbreviations for breeds are given in **Table 1**

11 **Table S5** LSBL outlier SNPs and candidate genes for high-altitude adaptation in Tibetan pigs

| Chr | Pos (bp)  | SNP | LSBL | Nearest Gene   | GST       | Non_GST   |
|-----|-----------|-----|------|----------------|-----------|-----------|
| 1   | 28240674  | C/T | 0.83 | -              | -         | -         |
| 1   | 34183450  | C/T | 0.86 | -              | -         | -         |
| 1   | 39858637  | C/T | 0.87 | -              | -         | -         |
| 1   | 39860028  | C/T | 0.83 | -              | -         | -         |
| 1   | 39861663  | C/T | 0.82 | -              | -         | -         |
| 1   | 39867697  | A/G | 0.83 | -              | -         | -         |
| 1   | 39872404  | C/T | 0.84 | -              | -         | -         |
| 1   | 39877999  | A/G | 0.82 | -              | -         | -         |
| 1   | 39893382  | C/T | 0.81 | -              | -         | -         |
| 1   | 62215449  | A/G | 0.83 | <i>U6</i>      | 0.68/0.32 | 0.03/0.97 |
| 1   | 83750022  | A/G | 0.82 | <i>AFGIL</i>   | 0.12/0.88 | 0.91/0.09 |
| 1   | 173275111 | C/T | 0.81 | -              | -         | -         |
| 1   | 173321046 | A/T | 0.83 | -              | -         | -         |
| 1   | 173352754 | C/T | 0.81 | -              | -         | -         |
| 1   | 173402103 | A/G | 0.83 | -              | -         | -         |
| 1   | 173405714 | C/T | 0.83 | -              | -         | -         |
| 1   | 173409945 | C/T | 0.82 | -              | -         | -         |
| 1   | 173415488 | A/G | 0.83 | -              | -         | -         |
| 1   | 232103972 | A/G | 0.82 | <i>NFIB</i>    | 0.56/0.44 | 1/0       |
| 1   | 266872281 | C/T | 0.82 | -              | -         | -         |
| 1   | 266877123 | C/G | 0.81 | -              | -         | -         |
| 1   | 267051772 | A/G | 0.88 | -              | -         | -         |
| 1   | 267061082 | A/G | 0.89 | -              | -         | -         |
| 1   | 275336992 | G/T | 0.86 | <i>OR13C8</i>  | 0.38/0.62 | 0.99/0.01 |
| 2   | 20853630  | C/T | 0.82 | -              | -         | -         |
| 2   | 20854387  | A/G | 0.81 | -              | -         | -         |
| 2   | 76381742  | A/G | 0.82 | <i>SGTA</i>    | 0.71/0.29 | 0.03/0.97 |
| 2   | 76386861  | A/G | 0.82 | <i>SGTA</i>    | 0.29/0.71 | 0.97/0.03 |
| 2   | 76388696  | C/T | 0.82 | <i>SGTA</i>    | 0.29/0.71 | 0.97/0.03 |
| 2   | 76392258  | G/T | 0.80 | <i>SGTA</i>    | 0.29/0.71 | 0.96/0.04 |
| 2   | 76395903  | A/G | 0.82 | <i>SGTA</i>    | 0.29/0.71 | 0.97/0.03 |
| 2   | 76397316  | C/T | 0.82 | <i>SGTA</i>    | 0.29/0.71 | 0.97/0.03 |
| 2   | 92447894  | A/G | 0.83 | <i>ATG10</i>   | 0.59/0.41 | 0.02/0.98 |
| 2   | 92575553  | G/T | 0.85 | <i>ATG10</i>   | 0.41/0.59 | 0.01/0.99 |
| 2   | 92624312  | A/T | 0.80 | -              | -         | -         |
| 2   | 133561349 | A/G | 0.81 | -              | -         | -         |
| 2   | 159222004 | C/T | 0.89 | <i>OR8U9</i>   | 0.71/0.29 | 0.02/0.98 |
| 3   | 48410423  | A/G | 0.81 | <i>KCNIP3</i>  | 0.59/0.41 | 0.02/0.98 |
| 3   | 49121066  | A/G | 0.83 | <i>TMEM127</i> | 0.56/0.44 | 0.01/0.99 |

|   |           |     |      |                |           |           |
|---|-----------|-----|------|----------------|-----------|-----------|
| 3 | 49137354  | C/T | 0.84 | <i>STARD7</i>  | 0.53/0.47 | 0.01/0.99 |
| 3 | 90008005  | A/C | 0.81 | -              | -         | -         |
| 3 | 93997195  | A/G | 0.80 | -              | -         | -         |
| 3 | 100194326 | C/T | 0.87 | <i>EPAS1</i>   | 0.76/0.24 | 0.03/0.97 |
| 3 | 100778801 | C/T | 0.81 | -              | -         | -         |
| 3 | 109936299 | C/T | 0.80 | <i>STRN</i>    | 0.32/0.68 | 0.97/0.03 |
| 3 | 110032611 | C/T | 0.89 | <i>VIT</i>     | 0.79/0.21 | 0.02/0.98 |
| 3 | 110035493 | A/G | 0.80 | <i>VIT</i>     | 0.15/0.85 | 0.92/0.08 |
| 4 | 8611777   | A/C | 0.80 | <i>LRRC6</i>   | 0.38/0.62 | 0.97/0.03 |
| 4 | 9467234   | A/T | 0.80 | -              | -         | -         |
| 4 | 49100995  | A/C | 0.84 | <i>SLC26A7</i> | 0.53/0.47 | 0.01/0.99 |
| 4 | 49129135  | A/T | 0.84 | <i>SLC26A7</i> | 0.5/0.5   | 0/1       |
| 4 | 49176545  | T/G | 0.80 | <i>SLC26A7</i> | 0.5/0.5   | 0.01/0.99 |
| 4 | 49178344  | G/A | 0.80 | <i>SLC26A7</i> | 0.5/0.5   | 0.01/0.99 |
| 4 | 49245313  | A/G | 0.80 | <i>SLC26A7</i> | 0.5/0.5   | 0.01/0.99 |
| 4 | 49250353  | C/T | 0.81 | <i>SLC26A7</i> | 0.53/0.47 | 0.01/0.99 |
| 4 | 49251859  | G/T | 0.80 | <i>SLC26A7</i> | 0.5/0.5   | 0.01/0.99 |
| 4 | 49252760  | T/G | 0.82 | <i>SLC26A7</i> | 0.53/0.47 | 0.01/0.99 |
| 4 | 49254953  | G/T | 0.80 | <i>SLC26A7</i> | 0.53/0.47 | 0.01/0.99 |
| 4 | 49257525  | C/G | 0.81 | <i>SLC26A7</i> | 0.53/0.47 | 0.01/0.99 |
| 4 | 49259030  | A/G | 0.81 | <i>SLC26A7</i> | 0.53/0.47 | 0.01/0.99 |
| 4 | 49260033  | A/G | 0.82 | <i>SLC26A7</i> | 0.53/0.47 | 0.01/0.99 |
| 4 | 49333306  | A/G | 0.80 | -              | -         | -         |
| 4 | 63838740  | A/G | 0.81 | -              | -         | -         |
| 5 | 17183757  | C/T | 0.80 | <i>DIP2B</i>   | 0.41/0.59 | 0/1       |
| 5 | 17186069  | A/G | 0.80 | <i>DIP2B</i>   | 0.41/0.59 | 0/1       |
| 5 | 27228173  | A/C | 0.81 | -              | -         | -         |
| 5 | 27459439  | C/G | 0.83 | -              | -         | -         |
| 5 | 27461626  | C/T | 0.83 | -              | -         | -         |
| 5 | 33029968  | C/T | 0.87 | <i>MSRB3</i>   | 0.76/0.24 | 0.03/0.97 |
| 5 | 33033862  | C/T | 0.87 | <i>MSRB3</i>   | 0.76/0.24 | 0.03/0.97 |
| 5 | 51186517  | C/T | 0.82 | <i>SSPN</i>    | 0.5/0.5   | 0.01/0.99 |
| 5 | 55086017  | C/G | 0.93 | <i>LDHB</i>    | 0.29/0.71 | 1/0       |
| 5 | 81423158  | A/G | 0.82 | -              | -         | -         |
| 5 | 105606669 | A/G | 0.83 | <i>LIN7A</i>   | 0.5/0.5   | 0/1       |
| 6 | 269612    | A/C | 0.82 | <i>TUBB3</i>   | 0.79/0.21 | 0.05/0.95 |
| 6 | 762440    | A/G | 0.82 | <i>ANKRD11</i> | 0.47/0.53 | 0.99/0.01 |
| 6 | 2758590   | C/T | 0.82 | <i>FOXL1</i>   | 0.97/0.03 | 0.1/0.9   |
| 6 | 57647095  | C/T | 0.87 | <i>AIBG</i>    | 0.21/0.79 | 0.97/0.03 |
| 7 | 19979173  | C/T | 0.86 | -              | -         | -         |
| 7 | 50664320  | C/T | 0.85 | -              | -         | -         |
| 7 | 100994873 | A/G | 0.85 | -              | -         | -         |

|    |           |     |      |                 |           |           |
|----|-----------|-----|------|-----------------|-----------|-----------|
| 7  | 114939308 | C/T | 0.82 | -               | -         | -         |
| 7  | 125212302 | A/G | 0.83 | -               | -         | -         |
| 8  | 32257261  | A/G | 0.81 | <i>RFC1</i>     | 0.59/0.41 | 0.02/0.98 |
| 8  | 39477546  | C/T | 0.84 | <i>ATP10D</i>   | 0.44/0.56 | 0.1/0.99  |
| 8  | 45569375  | G/T | 0.86 | <i>CPE</i>      | 0.62/0.38 | 0.03/0.98 |
| 8  | 71942916  | G/T | 0.81 | <i>SLC4A4</i>   | 0.71/0.29 | 0.04/0.96 |
| 8  | 78162657  | C/T | 0.81 | <i>FRAS1</i>    | 0.44/0.56 | 0.99/0.01 |
| 8  | 107012111 | C/G | 0.83 | -               | -         | -         |
| 8  | 107022462 | C/T | 0.81 | -               | -         | -         |
| 8  | 107170414 | A/G | 0.84 | -               | -         | -         |
| 8  | 107180581 | C/T | 0.83 | -               | -         | -         |
| 8  | 123350734 | A/G | 0.83 | -               | -         | -         |
| 8  | 139390404 | C/T | 0.80 | -               | -         | -         |
| 8  | 139558905 | G/T | 0.89 | -               | -         | -         |
| 9  | 32401369  | C/T | 0.86 | <i>CCDC82</i>   | 0.38/0.62 | 0.99/0.01 |
| 9  | 33084004  | C/T | 0.88 | -               | -         | -         |
| 9  | 48355486  | A/G | 0.83 | -               | -         | -         |
| 9  | 67737873  | A/G | 0.86 | -               | -         | -         |
| 9  | 67793610  | C/T | 0.82 | -               | -         | -         |
| 9  | 67820560  | A/C | 0.81 | -               | -         | -         |
| 10 | 15208746  | A/C | 0.82 | -               | -         | -         |
| 10 | 67341243  | A/G | 0.84 | -               | -         | -         |
| 11 | 9231108   | C/T | 0.85 | -               | -         | -         |
| 11 | 17793048  | C/T | 0.84 | -               | -         | -         |
| 11 | 22562982  | A/G | 0.87 | <i>NUFIP1</i>   | 0.65/0.35 | 0.01/0.99 |
| 11 | 34936704  | C/T | 0.83 | -               | -         | -         |
| 11 | 47420598  | C/G | 0.87 | -               | -         | -         |
| 11 | 48876512  | A/G | 0.85 | -               | -         | -         |
| 12 | 21402245  | A/G | 0.80 | <i>KRT31</i>    | 0.26/0.74 | 0.96/0.04 |
| 12 | 37494370  | A/C | 0.80 | -               | -         | -         |
| 13 | 32717854  | G/T | 0.87 | <i>LRRC2</i>    | 0.12/0.88 | 0.95/0.05 |
| 13 | 35330688  | C/T | 0.83 | -               | -         | -         |
| 13 | 38553459  | A/T | 0.82 | -               | -         | -         |
| 13 | 40237328  | A/G | 0.82 | <i>LRTM1</i>    | 0.65/0.35 | 0.02/0.98 |
| 13 | 117593410 | A/G | 0.81 | <i>PHC3</i>     | 0.47/0.53 | 0/1       |
| 13 | 117595505 | C/G | 0.81 | <i>PHC3</i>     | 0.47/0.53 | 0/1       |
| 13 | 117796930 | G/T | 0.81 | -               | -         | -         |
| 13 | 117834685 | A/G | 0.87 | -               | -         | -         |
| 13 | 128576882 | C/T | 0.82 | -               | -         | -         |
| 13 | 128580711 | A/G | 0.82 | -               | -         | -         |
| 13 | 200693380 | C/T | 0.81 | -               | -         | -         |
| 13 | 204856043 | C/T | 0.80 | <i>KRTAP7-1</i> | 0.56/0.44 | 1/0       |

|    |           |     |      |               |           |           |
|----|-----------|-----|------|---------------|-----------|-----------|
| 13 | 208450147 | A/G | 0.81 | -             | -         | -         |
| 14 | 71119994  | C/T | 0.81 | -             | -         | -         |
| 14 | 71125611  | C/G | 0.84 | -             | -         | -         |
| 14 | 71345983  | A/G | 0.81 | -             | -         | -         |
| 14 | 71347158  | A/C | 0.80 | -             | -         | -         |
| 14 | 71350237  | A/G | 0.81 | -             | -         | -         |
| 14 | 71351911  | G/T | 0.81 | -             | -         | -         |
| 14 | 71353781  | A/G | 0.81 | -             | -         | -         |
| 14 | 71355064  | C/T | 0.81 | -             | -         | -         |
| 14 | 71360044  | C/T | 0.81 | -             | -         | -         |
| 14 | 71361991  | A/G | 0.81 | -             | -         | -         |
| 14 | 71363376  | C/T | 0.81 | -             | -         | -         |
| 14 | 71366577  | G/T | 0.81 | -             | -         | -         |
| 14 | 71368011  | C/T | 0.81 | -             | -         | -         |
| 14 | 88230462  | A/G | 0.90 | <i>ZMIZI</i>  | 0.76/0.24 | 0.02/0.98 |
| 14 | 89216868  | A/C | 0.87 | -             | -         | -         |
| 14 | 89226920  | A/G | 0.87 | -             | -         | -         |
| 14 | 90322266  | A/G | 0.85 | -             | -         | -         |
| 14 | 91202884  | A/G | 0.83 | -             | -         | -         |
| 14 | 91215283  | G/T | 0.82 | -             | -         | -         |
| 14 | 113948491 | C/T | 0.82 | -             | -         | -         |
| 14 | 140706910 | A/G | 0.86 | <i>GRK5</i>   | 0.62/0.38 | 0.01/0.99 |
| 15 | 68075988  | G/T | 0.90 | -             | -         | -         |
| 15 | 93580077  | C/T | 0.85 | <i>OSBPL6</i> | 0.21/0.79 | 0.97/0.03 |
| 15 | 113838755 | A/G | 0.82 | <i>U6</i>     | 0.44/0.56 | 0.99/0.01 |
| 15 | 113845055 | C/T | 0.83 | -             | -         | -         |
| 16 | 5805256   | A/C | 0.82 | -             | -         | -         |
| 16 | 35258764  | A/C | 0.81 | -             | -         | -         |
| 16 | 35292898  | G/T | 0.85 | <i>ARL15</i>  | 0.15/0.85 | 0.95/0.05 |
| 16 | 35295963  | T/C | 0.85 | <i>ARL15</i>  | 0.15/0.85 | 0.95/0.05 |
| 16 | 41859629  | A/G | 0.81 | <i>PDE4D</i>  | 0.95/0.41 | 0.02/0.98 |
| 16 | 41862681  | A/G | 0.81 | <i>PDE4D</i>  | 0.95/0.41 | 0.02/0.98 |
| 17 | 22311428  | G/T | 0.83 | -             | -         | -         |
| 17 | 50521474  | C/T | 0.91 | <i>PTPRT</i>  | 0.79/0.21 | 0.02/0.98 |
| 17 | 62907460  | G/T | 0.87 | -             | -         | -         |
| 17 | 62909714  | A/G | 0.87 | -             | -         | -         |
| 18 | 13474698  | G/T | 0.82 | -             | -         | -         |
| 18 | 22098383  | C/T | 0.82 | <i>GRM8</i>   | 0.79/0.21 | 0.05/0.95 |
| 18 | 24936175  | C/T | 0.86 | -             | -         | -         |
| 18 | 34572055  | A/G | 0.83 | -             | -         | -         |
| 18 | 39621369  | C/T | 0.85 | -             | -         | -         |



13 **Table S6** Serum hemoglobin contents of 54 Gansu Tibetan pigs

| <b>Sample ID</b> | <b>HGB (g/L)</b> | <b>HapI haplotype carrier</b> |
|------------------|------------------|-------------------------------|
| A7               | 118              | No                            |
| A8               | 151              | No                            |
| B4               | 126              | No                            |
| B6               | 135              | No                            |
| B7               | 113              | No                            |
| B9               | 166              | No                            |
| C7               | 150              | No                            |
| C9               | 138              | No                            |
| C10              | 147              | No                            |
| D3               | 136              | No                            |
| D4               | 160              | No                            |
| D6               | 125              | No                            |
| D12              | 132              | No                            |
| E4               | 149              | No                            |
| E7               | 136              | No                            |
| E8               | 125              | No                            |
| E9               | 140              | No                            |
| A1               | 122              | Yes                           |
| A2               | 133              | Yes                           |
| A3               | 144              | Yes                           |
| A4               | 142              | Yes                           |
| A5               | 141              | Yes                           |
| A6               | 147              | Yes                           |
| A12              | 148              | Yes                           |
| B2               | 159              | Yes                           |
| B3               | 134              | Yes                           |
| B5               | 137              | Yes                           |
| B8               | 137              | Yes                           |
| B10              | 174              | Yes                           |
| B11              | 145              | Yes                           |
| B12              | 136              | Yes                           |
| C1               | 139              | Yes                           |
| C2               | 121              | Yes                           |
| C3               | 170              | Yes                           |
| C4               | 157              | Yes                           |
| C5               | 160              | Yes                           |
| C6               | 161              | Yes                           |
| C8               | 157              | Yes                           |
| C11              | 156              | Yes                           |

|     |     |     |
|-----|-----|-----|
| C12 | 177 | Yes |
| D1  | 147 | Yes |
| D2  | 180 | Yes |
| D5  | 153 | Yes |
| D7  | 156 | Yes |
| D8  | 146 | Yes |
| D9  | 166 | Yes |
| D10 | 148 | Yes |
| E1  | 115 | Yes |
| E2  | 135 | Yes |
| E6  | 139 | Yes |
| E10 | 152 | Yes |
| E11 | 153 | Yes |
| E12 | 144 | Yes |
| F1  | 132 | Yes |

---

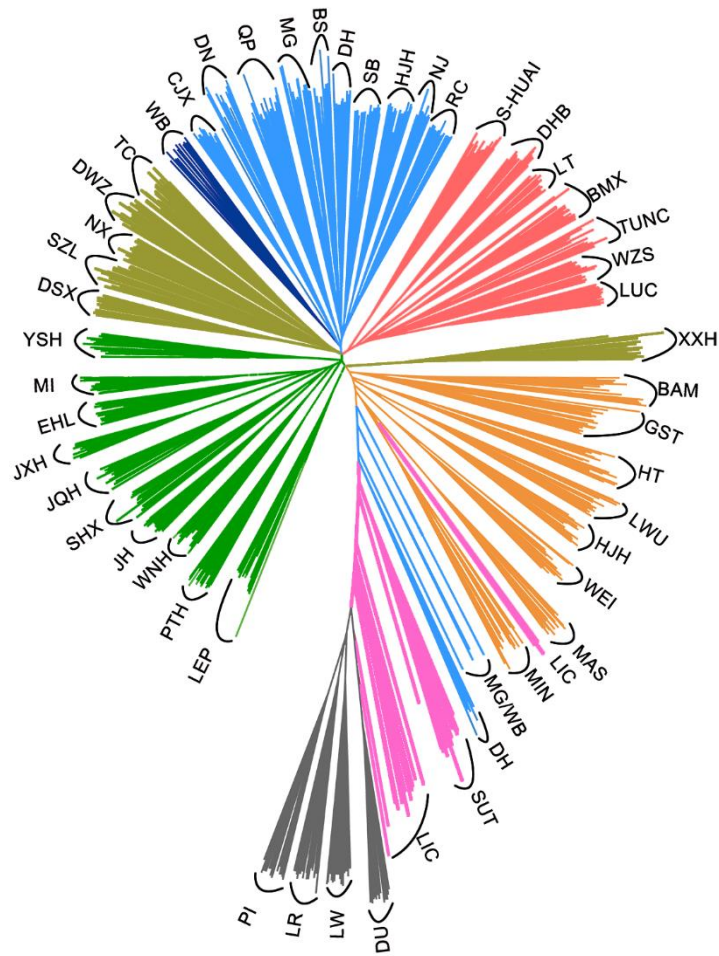

15

16 **Figure S1** Neighbor-joining phylogenetic tree of 718 pigs tested in this study. In this tree, two  
 17 MG pigs, two wild boars and five DH pigs locate at intermediate positions between Chinese  
 18 and European pigs, which is likely resulted from admixture events. These nine pigs were hence  
 19 discarded for further analysis. Abbreviations for breeds are given in Table 1. Color codes for  
 20 breeds are as in Figure 1.

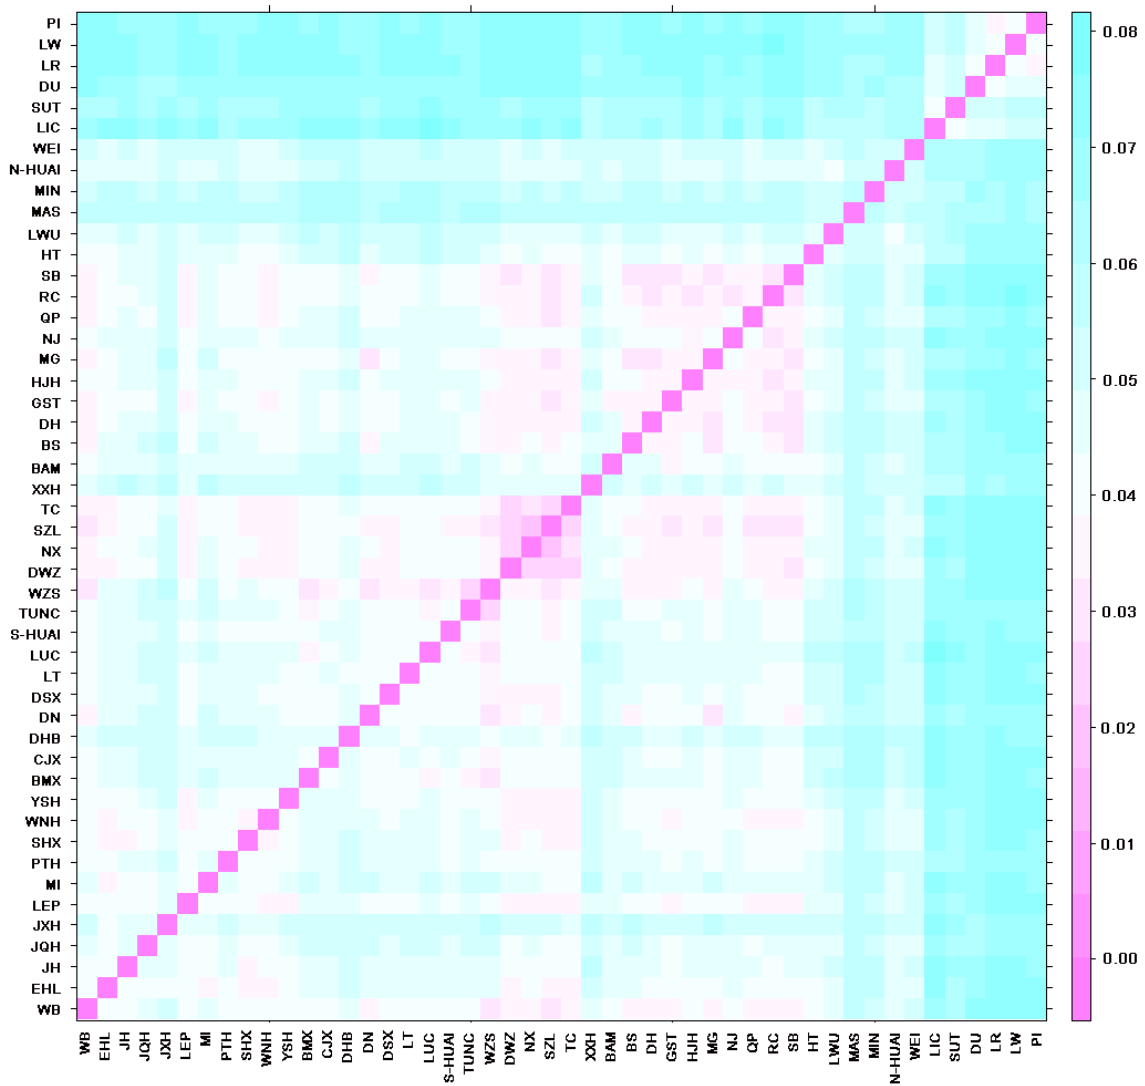

21

22 **Figure S2** A heat map of pairwise Nei genetic distance amongst 47 Chinese and European  
 23 domestic breeds and wild boars. Abbreviation for breeds and their ecotypes are given in Table  
 24 1.

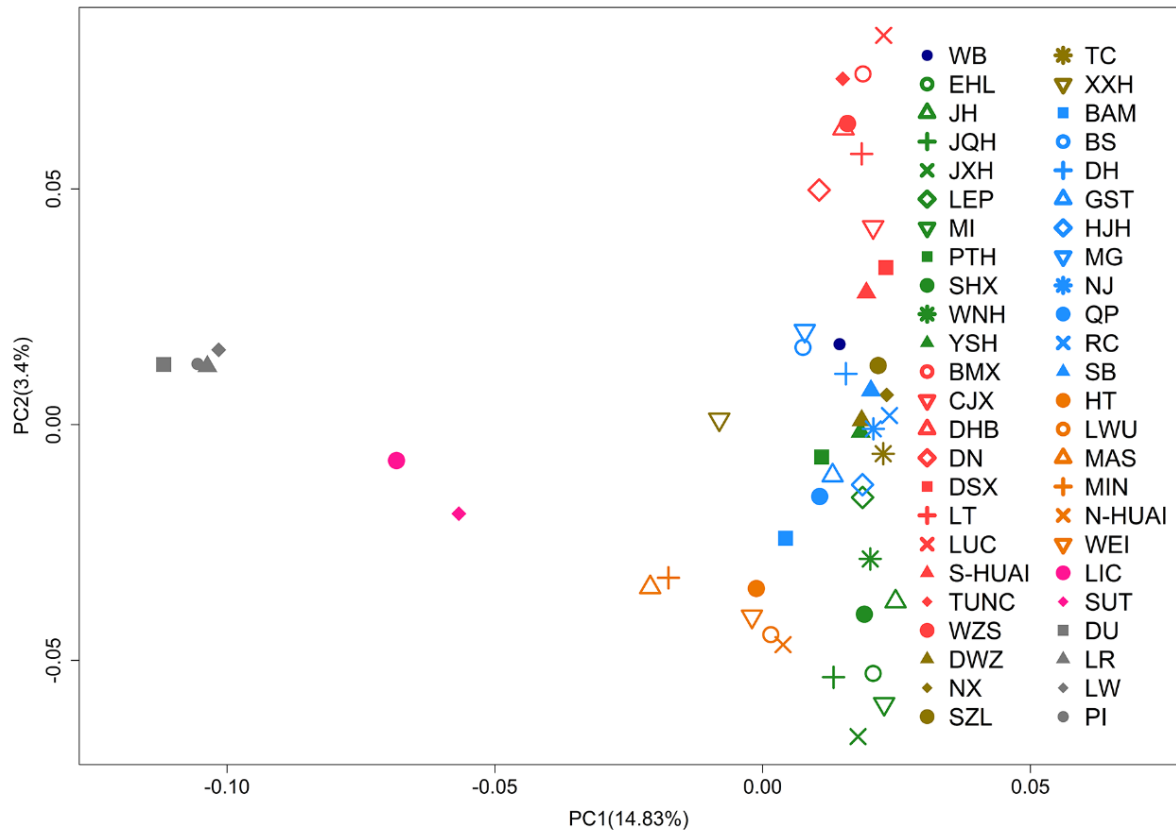

25

26 **Figure S3** Principal component analysis of 48 Chinese and European pig breeds. The first (PC1)  
 27 and second component (PC2) are shown. Each figured point represents the average eigenvector  
 28 of one breed.

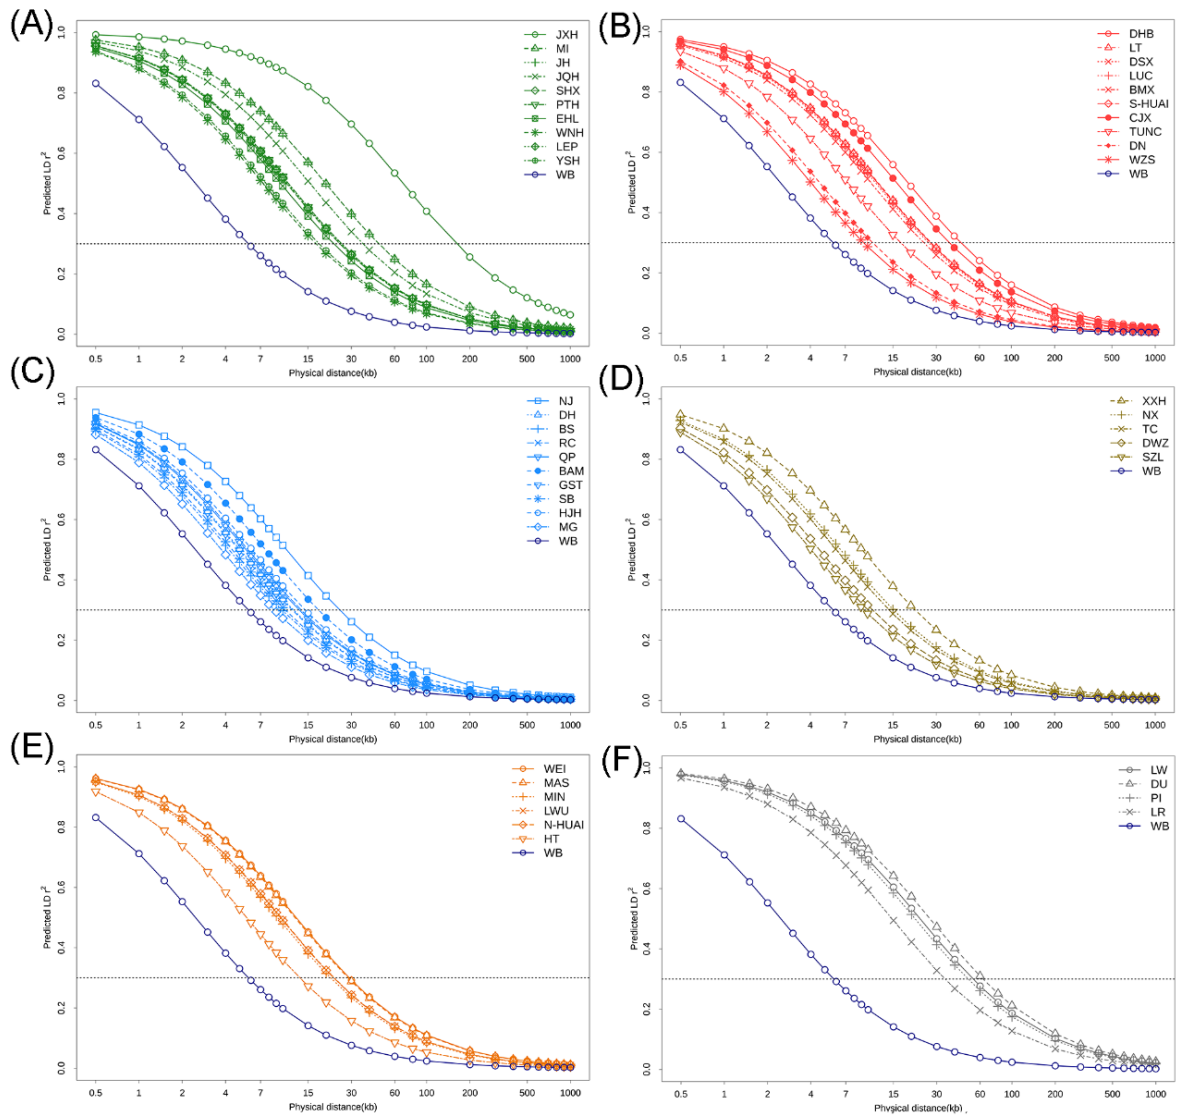

29

30 **Figure S4** Linkage disequilibrium (LD) profiles in Chinese and European pigs. The profiles are  
 31 shown for breeds from East China (A), South China (B), Central China (C), Southwest China  
 32 (D), North China (E) and Europe (F). Wild boars are shown as an outgroup in each panel.

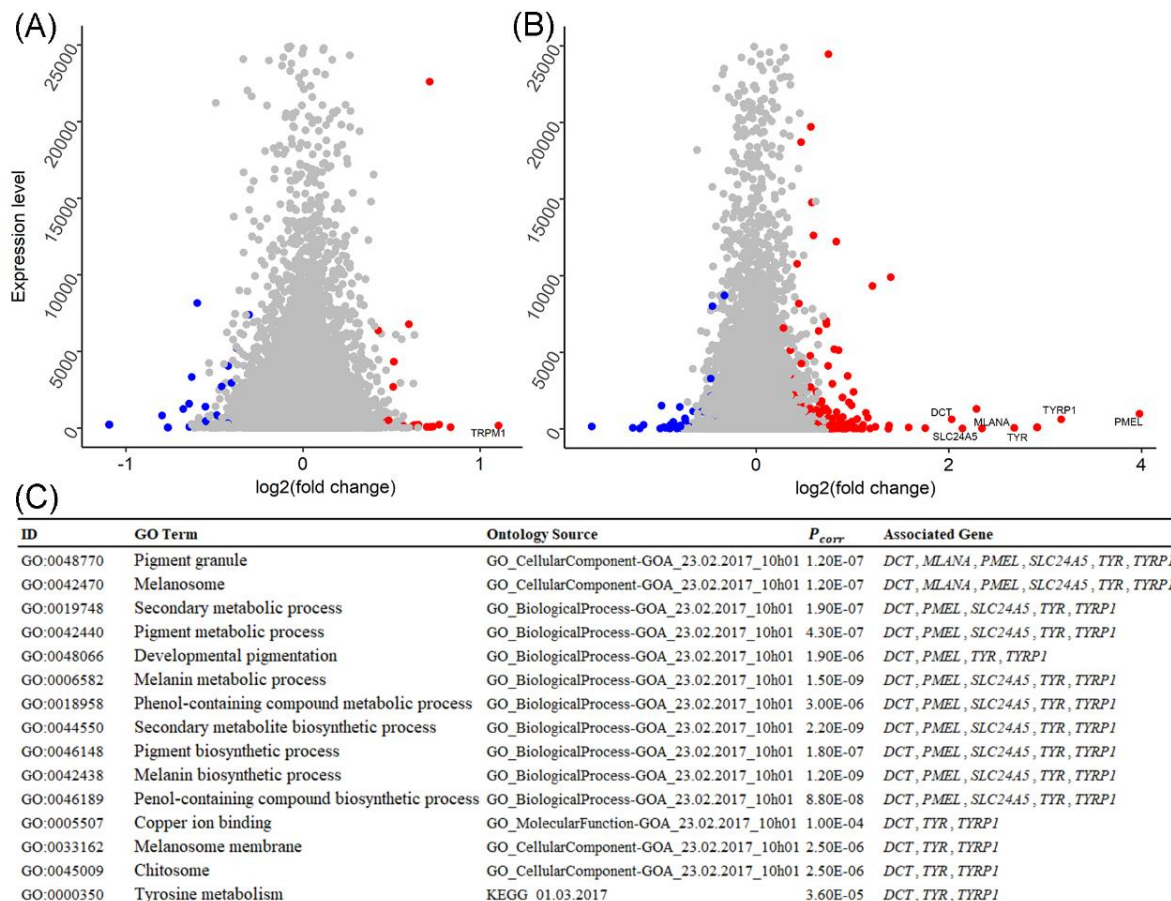

33

34 **Figure S5** Differentially expressed genes between black and white skin tissues of Bamaxiang  
 35 and Jinhua pigs. (A) Bamaxiang pigs. (B) Jinhua pigs. (C) GO terms and KEGG pathways in  
 36 which 34 differentially expressed genes in Jinhua pigs are enriched. Up- and down- regulated  
 37 genes in the black skin are indicated by red and blue dots, respectively. Well-characterized  
 38 pigmentation genes are highlighted in panels A and B.
